# Supplementary material for: CoOx(OH)y/C nanocomposites in situ derived from Na4Co3(PO4)2P2O7 as sustainable electrocatalysts for water splitting
Source: Royal Society of Chemistry journal article supplement (doi:10.1039/c8dt03593h), 2018-01-01
Supplement: c8dt03593h1.pdf [file c8dt03593h1.pdf]

## Electronic Supplementary Information (ESI)

### **CoO<sub>x</sub>(OH)<sub>y</sub>/C nanocomposites *in situ* derived from Na<sub>4</sub>Co<sub>3</sub>(PO<sub>4</sub>)<sub>2</sub>P<sub>2</sub>O<sub>7</sub> as sustainable electrocatalysts for water splitting**

Ievgen V. Odynets,<sup>a</sup> Nataliia Yu. Strutynska,<sup>b</sup> Junzhi Li,<sup>a</sup> Wei Han,<sup>a,c</sup> Igor V. Zatovsky\*<sup>a</sup>  
and N.I. Klyui\*<sup>a,d</sup>

<sup>a</sup> Jilin Supercapacitor Engineering Laboratory, College of Physics, Jilin University, 2699 Qianjin str., 130012 Changchun, P.R. China.

<sup>b</sup> Taras Shevchenko National University, 64/13 Volodymyrska str., 01601 Kyiv, Ukraine

<sup>c</sup> International Center of Future Science, Jilin University, Changchun City 130012, PR China

<sup>d</sup> V. Lashkaryov Institute of Semiconductor Physics, NAS of Ukraine, 41 pr. Nauki, 03028 Kyiv, Ukraine

E-mail: [klyuini@ukr.net](mailto:klyuini@ukr.net) (N.I. Klyui\*); [zvigo@yandex.ru](mailto:zvigo@yandex.ru) (Igor. V. Zatovsky\*)

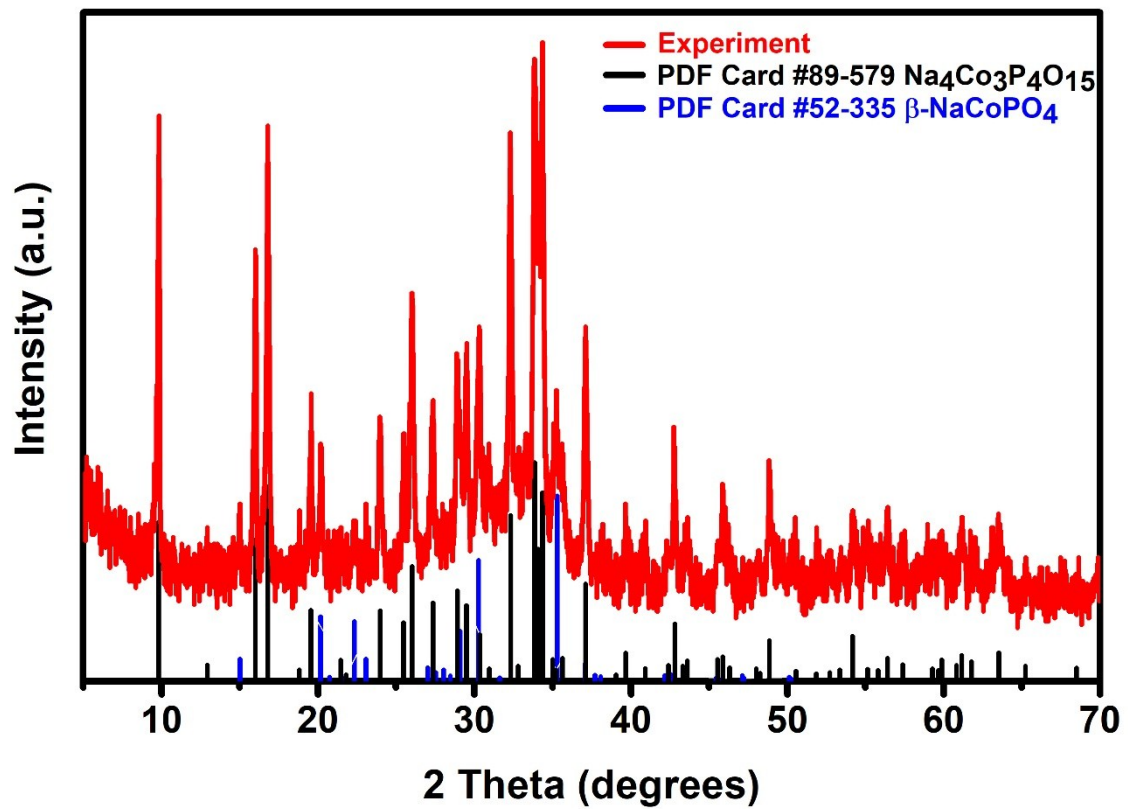

Fig. S1. Powder XRD pattern of GC at 600 °C heated during 3 hours.

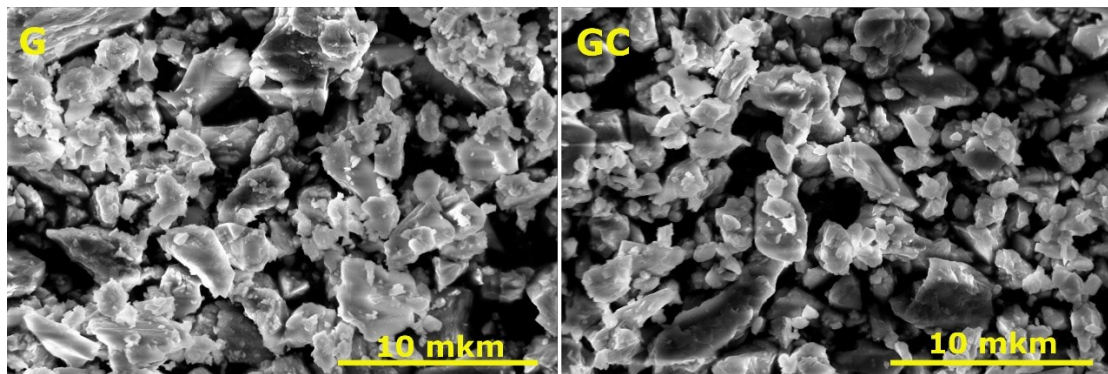

Fig. S2. SEM image of G and GC after milling.

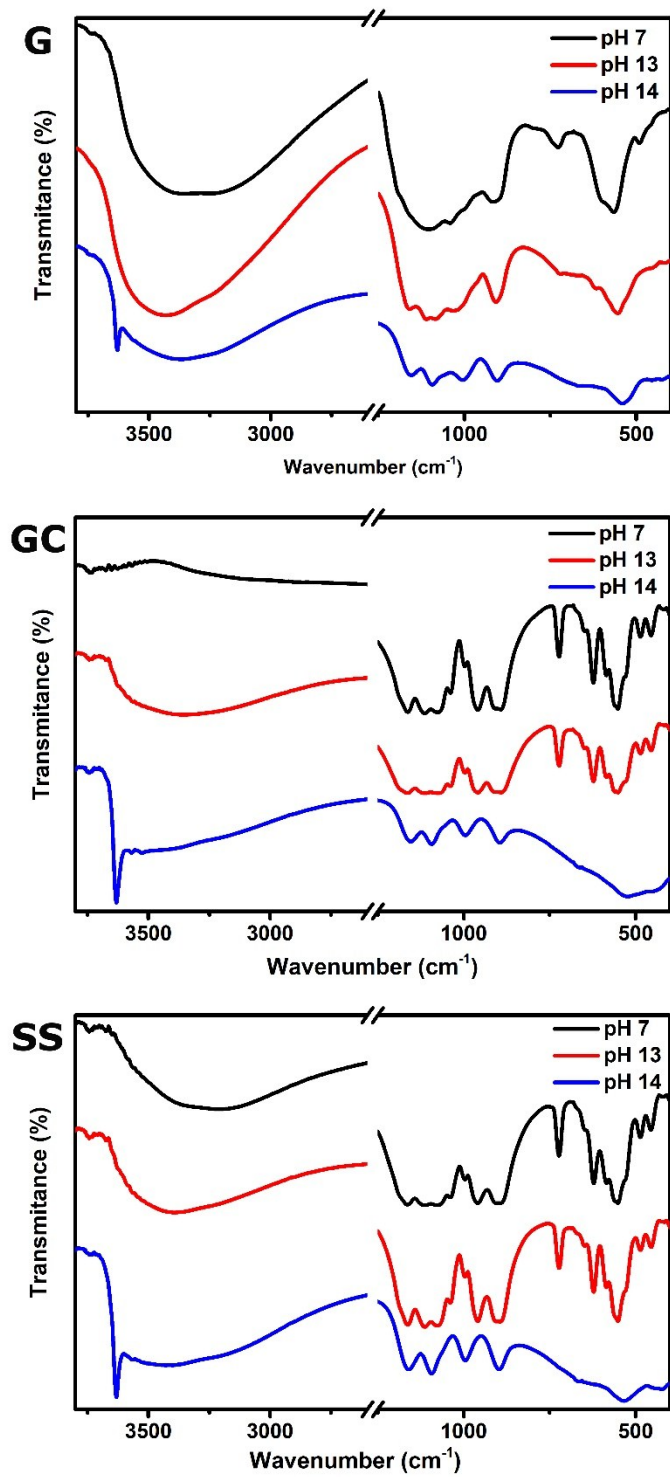

**Fig. S3.** FTIR spectra of **G**, **GC** and **SS** after chemical treatment in different solution (pH 7, 13, 14).

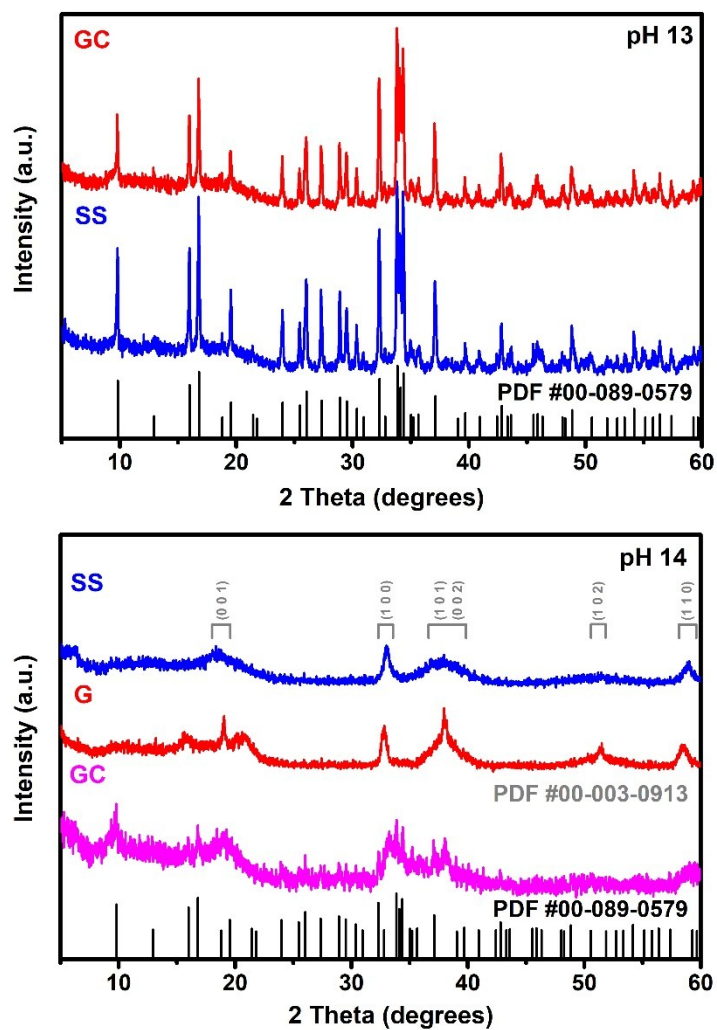

**Fig. S4.** Powder XRD pattern of **G**, **GC** and **SS** after chemical treatment in different solution (pH 13 and 14). PDF #00-089-0579 –  $\text{Na}_4\text{Co}_3\text{P}_4\text{O}_{15}$ ; PDF #00-003-0913 –  $\beta\text{-Co(OH)}_2$ .

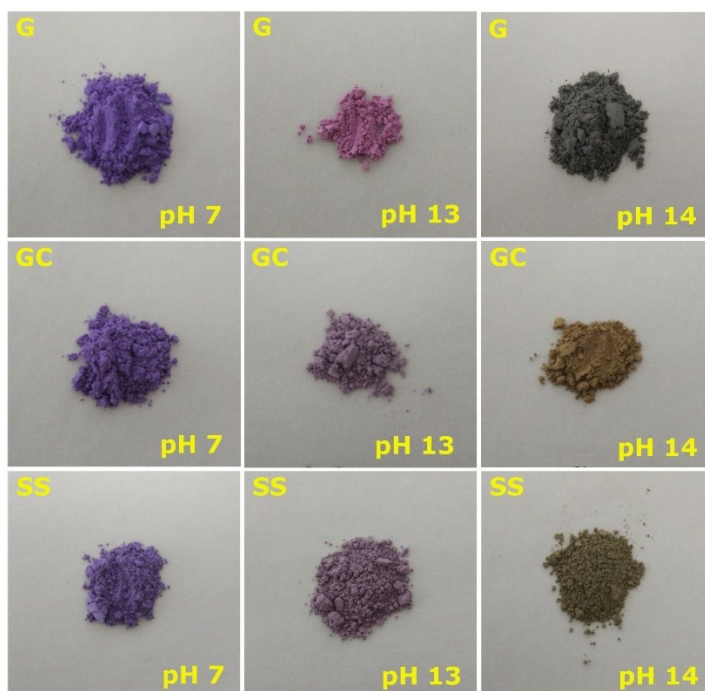

**Fig. S5.** Photo of the **G**, **GC** and **SS** powders after chemical treatment in different solution (pH 7, 13, 14).

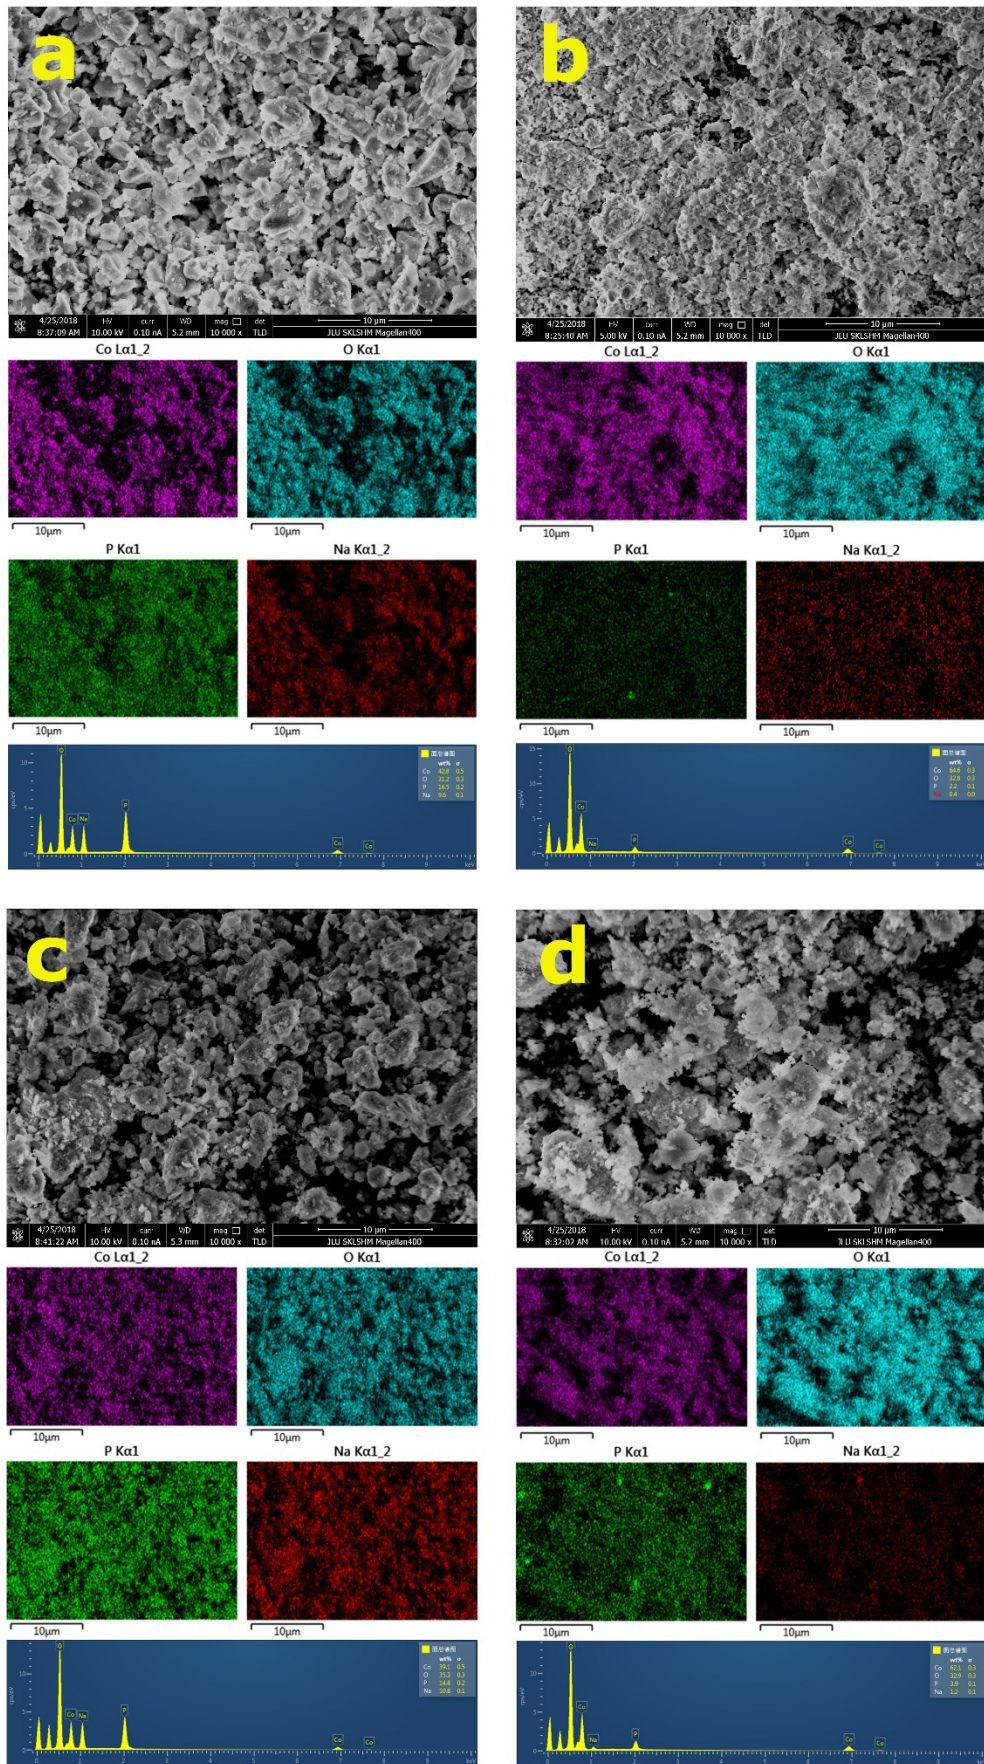

**Fig. S6.** SEM image, EDS and elemental mapping of composite with polycrystalline sample (SS) after chemical treatment in base solution pH 13 (a) and 14 (b), SEM image, EDS and elemental mapping of composite with polycrystalline sample (GC) after chemical treatment in base solution pH 13 (c) and 14 (d).

**Table S1.** XPS data of  $\text{Na}_4\text{Co}_3\text{P}_4\text{O}_{15}$  (sample **SS**): as-prepared, after OER and HER test.

| Sample      | $\text{Co}^{2+}$                 |                                  | $\text{Co}^{3+}$ |            | $\text{O}^{2-}$                  | $\text{P}^{5+}$ | $\text{Na}^+$ | $\text{C}^{4+}$                                          |
|-------------|----------------------------------|----------------------------------|------------------|------------|----------------------------------|-----------------|---------------|----------------------------------------------------------|
|             | $2p_{3/2}$                       | $2p_{1/2}$                       | $2p_{3/2}$       | $2p_{1/2}$ | $1s$                             | $2p$            | $1s$          | $1s$                                                     |
| As-prepared | 781.9 eV<br>(785.2 eV satellite) | 797.9 eV<br>(803.0 eV satellite) | -                | -          | 530.9 eV<br>531.8 eV<br>535.7 eV | 133.3 eV        | 1071.9 eV     | 284.8 eV                                                 |
| After OER   | 780.7 eV<br>(790.3 eV satellite) | 796.5 eV<br>(805.2 eV satellite) | 779.9 eV         | 794.9 eV   | 529.5 eV<br>531.0 eV<br>531.9 eV | -               | 1071.0 eV     | 284.6 eV<br>284.9 eV<br>287.9 eV<br>290.9 eV             |
| After HER   | 780.9 eV<br>(790.2 eV satellite) | 795.6 eV<br>(804.3 eV satellite) | 779.9 eV         | 794.9      | 529.7 eV<br>531.0 eV<br>532.3 eV | -               | 1070.5 eV     | 283.0 eV<br>284.5 eV<br>285.2 eV<br>288.2 eV<br>290.4 eV |

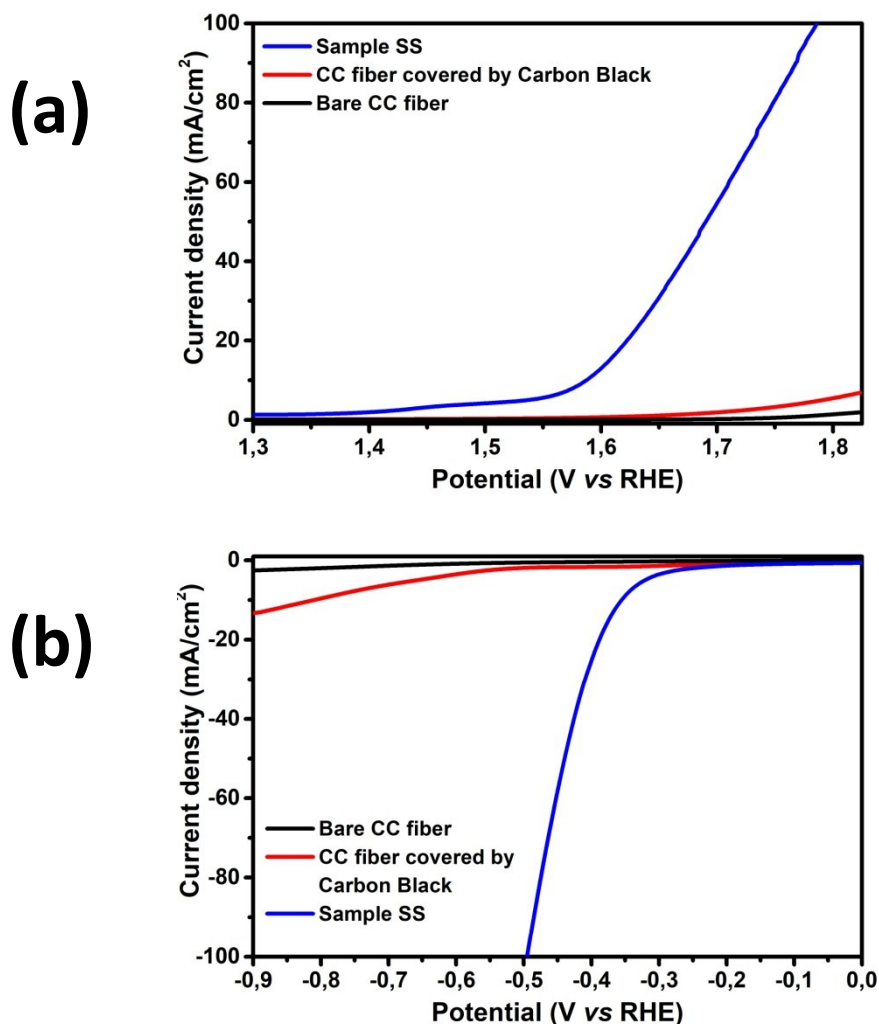

**Fig. S7.** LSV curves for carbon fiber, carbon fiber with carbon black and **SS** at a scan rate of  $1 \text{ mV}\cdot\text{s}^{-1}$  in a 1M NaOH solution: (a) for OER process; (b) for HER process.

| Parameters                                    | Pristine | Before chronopotentiometry | After chronopotentiometry |
|-----------------------------------------------|----------|----------------------------|---------------------------|
| $L \times 10^{-6}$ (H·cm <sup>-2</sup> )      | 1.491    | 1.56                       | $4.26 \times 10^{-16}$    |
| $R_s$ ( $\Omega$ ·cm <sup>-2</sup> )          | 1.503    | 1.535                      | 1.649                     |
| $Y_o$ (S·sec <sup>n</sup> ·cm <sup>-2</sup> ) | 0.006781 | 0.2372                     | $5.147 \times 10^{20}$    |
| Freq power, n (0<n<1)                         | 0.8827   | 0.5875                     | 0.542                     |
| CPE $\times 10^3$ (F·cm <sup>-2</sup> )       | 5.917    | 18.44                      | $3994 \times 10^5$        |
| $R_{ct}$ ( $\Omega$ ·cm <sup>-2</sup> )       | 0.1289   | 3.201                      | $7.024 \times 10^{10}$    |

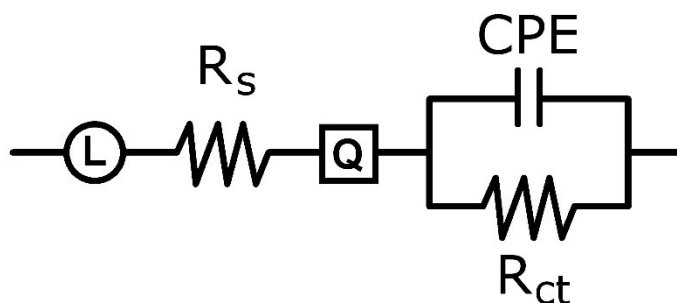

Fig. S8. The equivalent circuit for fitting the AC impedance results after OER.

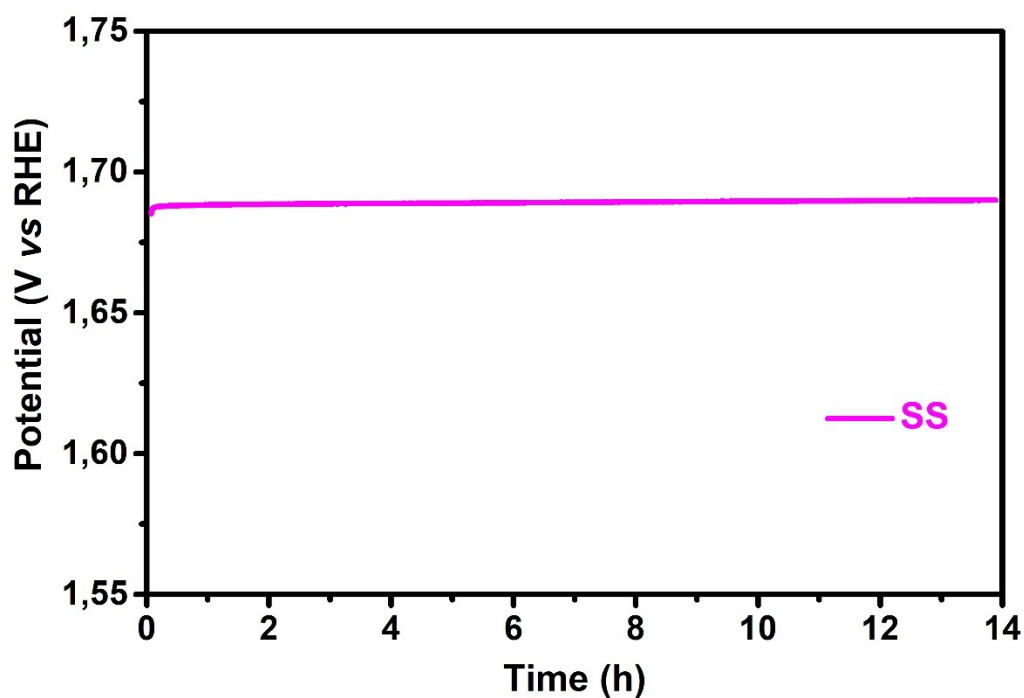

Fig. S9. Time dependencies of potential under a constant current density of  $20 \text{ mA}\cdot\text{cm}^{-2}$  for SS, second measurement, OER test.

| Parameters                                                                    | Before chronopotentiometry | After chronopotentiometry |
|-------------------------------------------------------------------------------|----------------------------|---------------------------|
| $R_s$ ( $\Omega \cdot \text{cm}^{-2}$ )                                       | 2.915                      | 2.849                     |
| $\text{CPE} \times 10^3$ ( $\text{F} \cdot \text{cm}^{-2}$ )                  | 2.729                      | 3.817                     |
| $R_{ct}$ ( $\Omega \cdot \text{cm}^{-2}$ )                                    | 36.11                      | 1606                      |
| $Y_o \times 10^3$ ( $\Omega^{-1} \cdot \text{cm}^{-2} \cdot \text{S}^{0.5}$ ) | 33.44                      | 2.459                     |

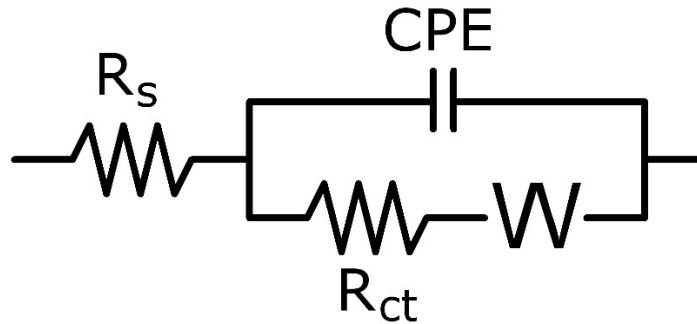

**Fig S10.** The equivalent circuit for fitting the AC impedance results after HER.

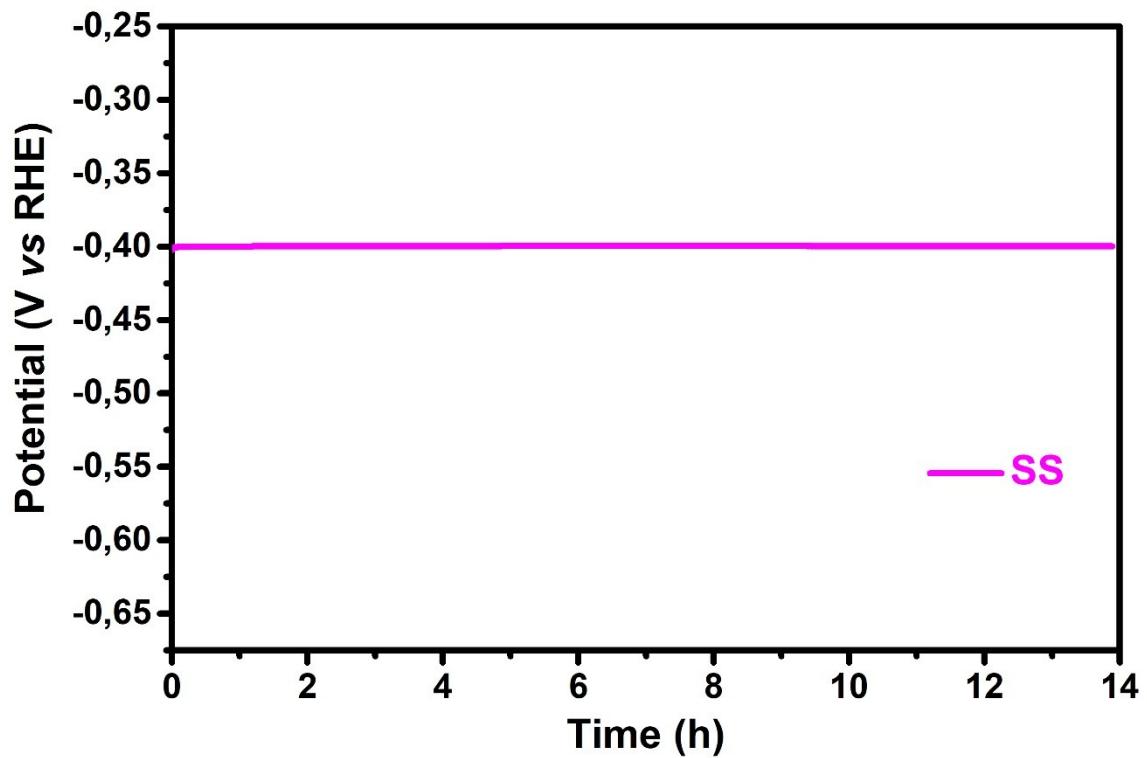

**Fig. S11.** Time dependencies of potential under a constant current density of  $20 \text{ mA} \cdot \text{cm}^{-2}$  for SS, second measurement, HER test.
